# Supplementary material for: Unprecedented, fully recyclable, solid-supported reagent for the kinetic resolution of racemic amines through enantioselective N-acetylation
Source: Royal Society of Chemistry journal article supplement (doi:10.1039/b504200c), 2005-01-01
Supplement: b504200c.pdf [file b504200c.pdf]

# Unprecedented, Fully Recyclable, Solid-Supported Reagent for the Kinetic Resolution of Racemic Amines through Enantioselective *N*-Acetylation

**Stellios Arseniyadis, Pithani V. Subhash, Alain Wagner\* and Charles Mioskowski\***

*Université Louis Pasteur de Strasbourg, UMR 7514 associée au CNRS, Laboratoire de Synthèse Bioorganique Faculté de Pharmacie, 74, Route du Rhin, 67401 Illkirch-Graffenstaden.*

**Alain Valleix**

*CEA-Saclay, Service des Molécules Marquées, Bât. 547  
Département de Biologie Cellulaire et Moléculaire, F-91191, Gif-sur-Yvette.*

## Supporting Information

**General Considerations.** Glassware was oven-dried before use and cooled to room temperature under N<sub>2</sub>. All solvents were commercially available and used without further purification unless noted otherwise. Yields and ee's in the tables refer to isolated yields (average of at least two runs) of compounds which are ≥95% pure as determined by <sup>1</sup>H NMR. All products were characterized by <sup>1</sup>H NMR, <sup>13</sup>C NMR, and infrared (IR) spectroscopy. Analytical thin-layer chromatography (TLC) were performed using 2.5 cm x 5 cm plates coated with a 0.25 mm thickness of silica gel 60F-254 Merck, and visualization was accomplished with ultraviolet light or with ethanolic bromocresol green. Flash chromatography were performed using silica gel 60 Merck (40-60 mm). IR spectra were taken on a Perkin Elmer 1600 FT-IR spectrophotometer with samples prepared as KBr pellets (2-8 mg of product was pulverized with 100 mg of KBr and pressed into a pellet in standard fashion). <sup>1</sup>H and <sup>13</sup>C NMR spectra were recorded on a Bruker WP-200 SY or on a Bruker DPX 300 spectrometer at ambient temperature. All <sup>1</sup>H NMR spectra (200 or 300 MHz) are reported as follows: chemical shift in parts per million, ppm, downfield from tetramethylsilane as an internal standard (□ scale), multiplicity (br=broad, s=singlet, d=doublet, t=triplet, q=quartet, and m=multiplet, integration, and coupling constant (Hz). All <sup>13</sup>C NMR spectra (50 or 75 MHz) are determined with complete proton decoupling and reported in ppm relative to the central line of the triplet for CDCl<sub>3</sub> at 77 ppm. Analytical chiral HPLC were performed on Daicel Chiralcel OD column (250 mm x 4.6 mm). Mass spectra were

recorded on a Finnigan-Mat 4600 spectrometer. Melting points were obtained using a Reichert-Jung melting point apparatus.

**(1*S*,2*S*)-*N*-Acetyl-1,2-*bis*-trifluoromethanesulfonamidocyclohexane (1).** Freshly distilled acetyl chloride (1.88 mL, 2.64 mmol) was added dropwise by syringe to a stirred solution of 1,2-*bis*-(trifluoromethanesulfonamido)-cyclohexane (Aldrich; 1.00 g, 2.64 mmol) and triethylamine (5.50 mL, 3.96 mmol) in Et<sub>2</sub>O (20 mL) at -20 °C. The mixture was stirred 3h at 0 °C, time after which the solvent was removed under reduced pressure. The resulting residue was subjected to flash chromatography on silica gel (EtOAc/*n*-Hexane: 1/9) to afford the desired product as a white solid in 85% yield. mp = 111 °C;  $[\alpha]_D^{20} = +17.46^\circ$  (c = 1.5; CHCl<sub>3</sub>); <sup>1</sup>H NMR (300 MHz, CDCl<sub>3</sub>)  $\delta$  1.10 to 1.60 (m, 3H), 1.70 to 2.00 (m, 3H), 2.05 to 2.35 (m, 1H), 2.35 to 2.60 (m, 1H), 2.52 (s, 3H), 3.60 to 4.05 (m, 1H), 4.10 to 4.60 (m, 1H), 5.04 (d, *J*=10 Hz, 1H); <sup>13</sup>C NMR (75 MHz, CDCl<sub>3</sub>)  $\delta$  24.4, 25.5, 26.8, 29.1, 35.4, 54.5, 66.9, 119.4, 119.5, 170.0; FTIR (CsI)  $\nu$  3296, 3221, 2947, 2868, 1737, 1716, 1456, 1385, 1233, 1200, 1131, 1071, 1016, 971, 942, 918, 896, 737, 611, 532. MS (IC/NH<sub>3</sub>, m/z) = 438 [M+NH<sub>4</sub>]<sup>+</sup>.

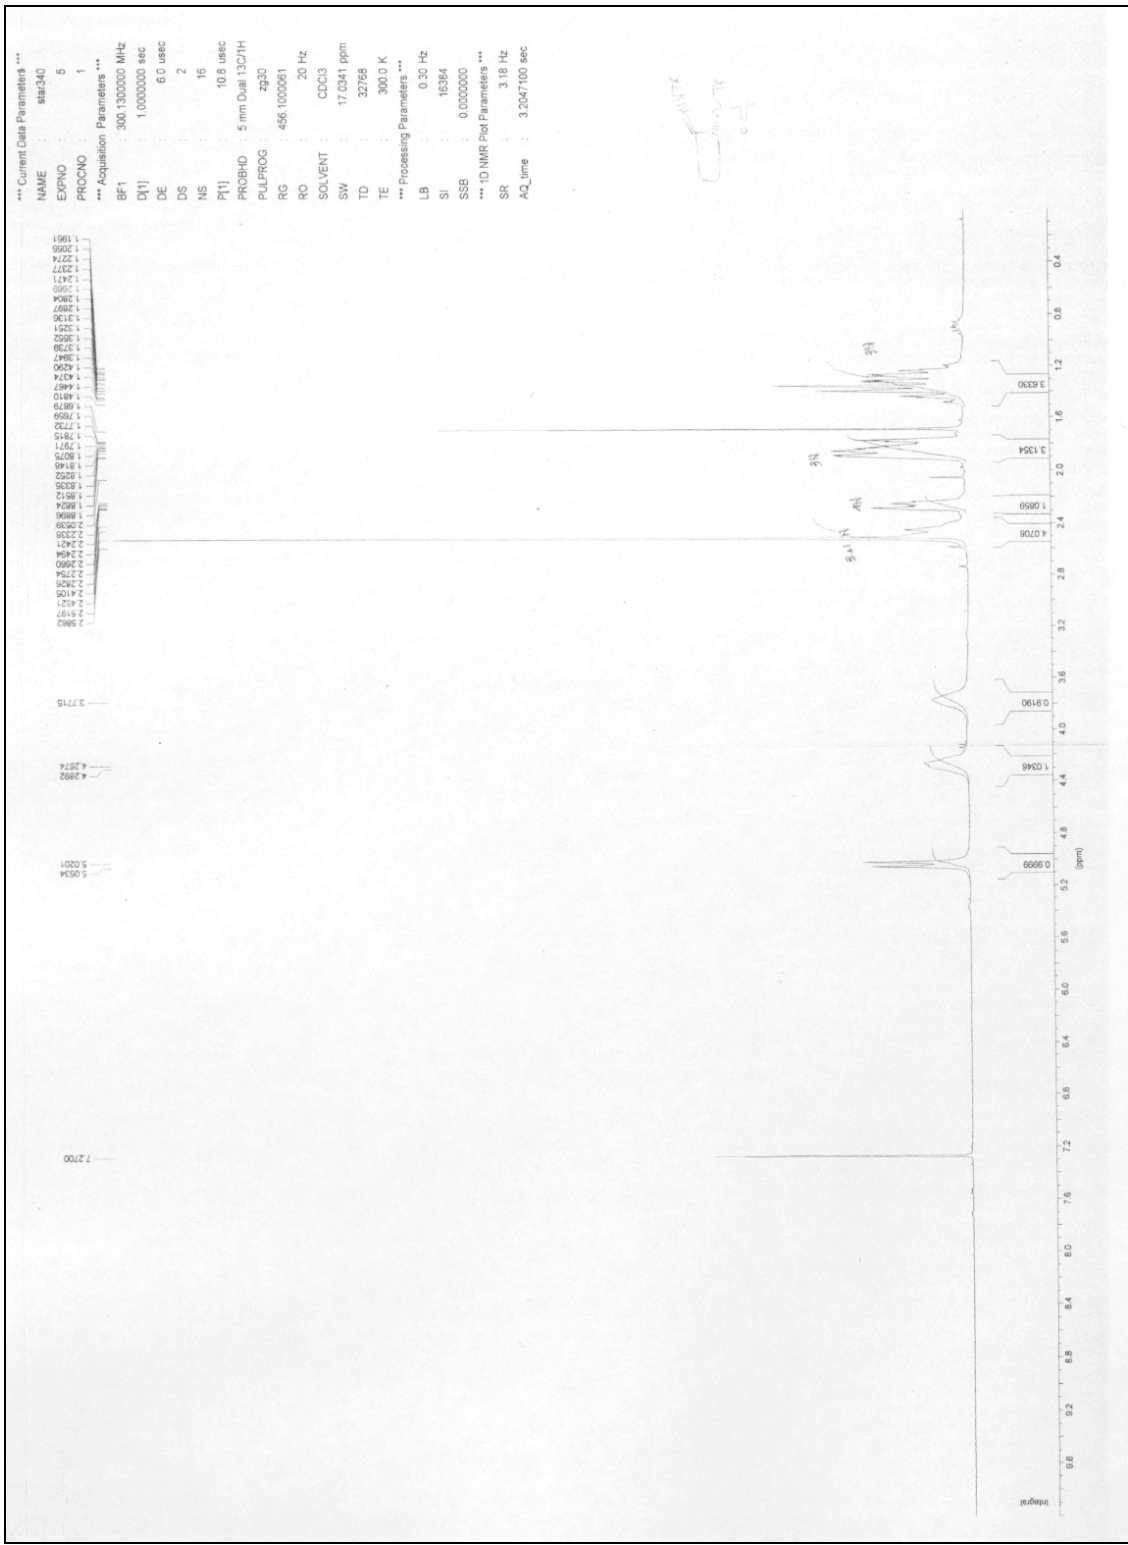

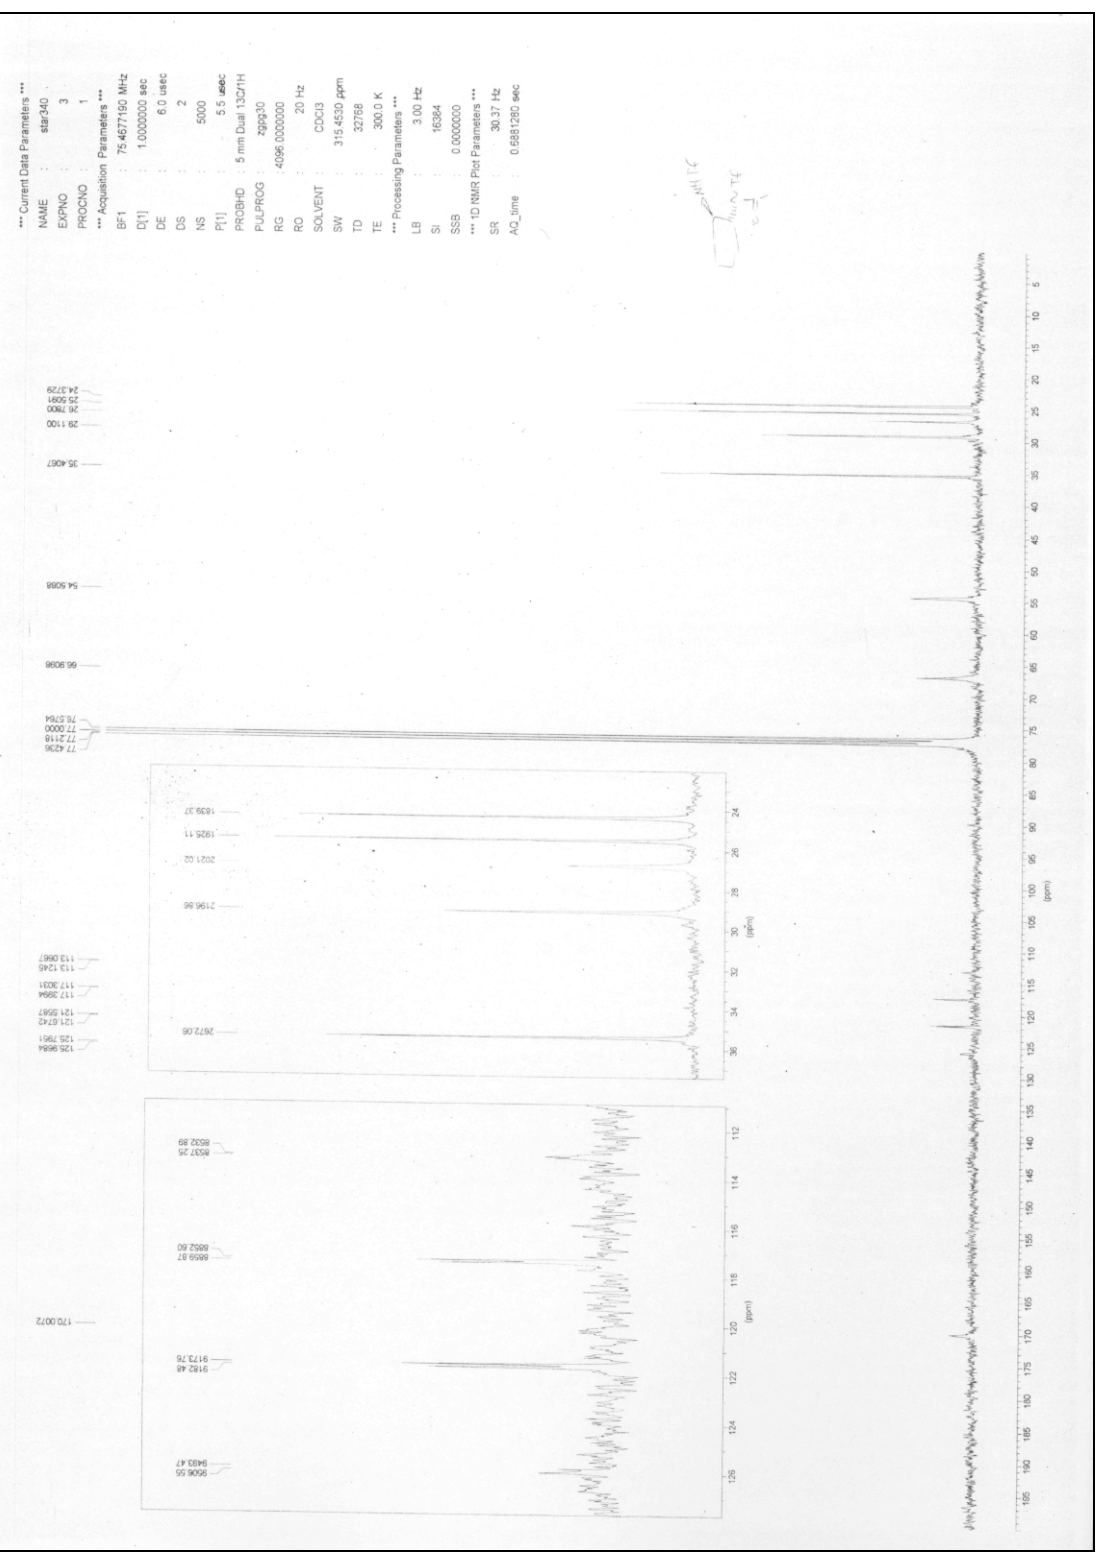



\*\*\* Acquisition Parameters \*\*\*

NAME : sta340  
EXPNO : 4  
PROCNO : 1  
\*\*\* Acquisition Parameters \*\*\*  
BF1 : 75.467190 MHz  
D[1] : 0.500000 sec  
DE : 6.0 usec  
DS : 2  
NS : 2000  
PT1 : 5.5 usec  
PROBHD : 5 mm Dual 13C/1H  
PULPROG : dept135  
RG : 4056.000000  
RO : 20 Hz  
SOLVENT : CDCl3  
SW : 300.4303 ppm  
TD : 32768  
TE : 300.0 K  
\*\*\* Processing Parameters \*\*\*  
LB : 3.00 Hz  
SI : 16384  
SSB : 0.000000  
\*\*\* ID NMR Plot Parameters \*\*\*  
SR : 30.93 Hz  
AQ\_time : 0.7225340 sec

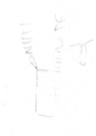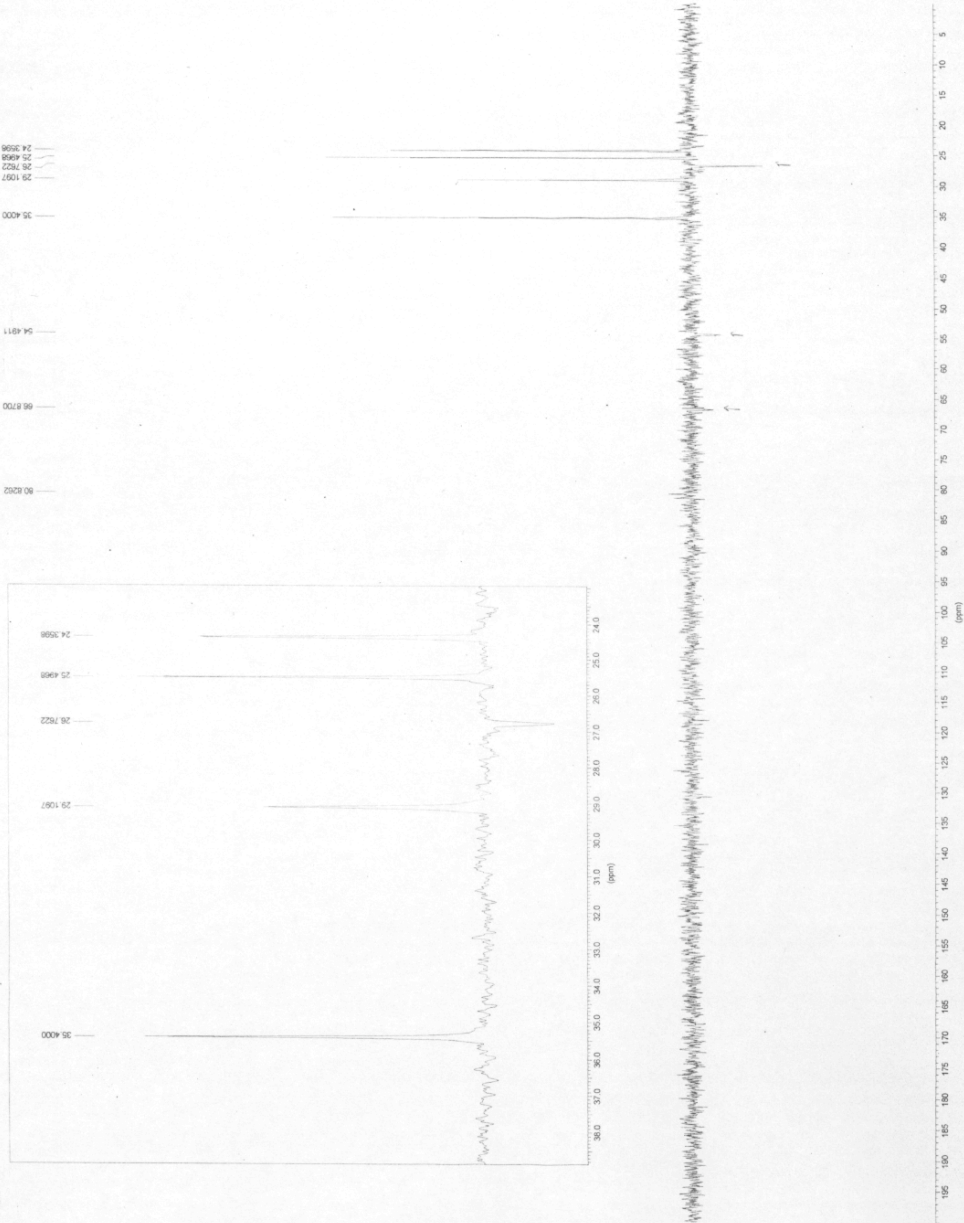

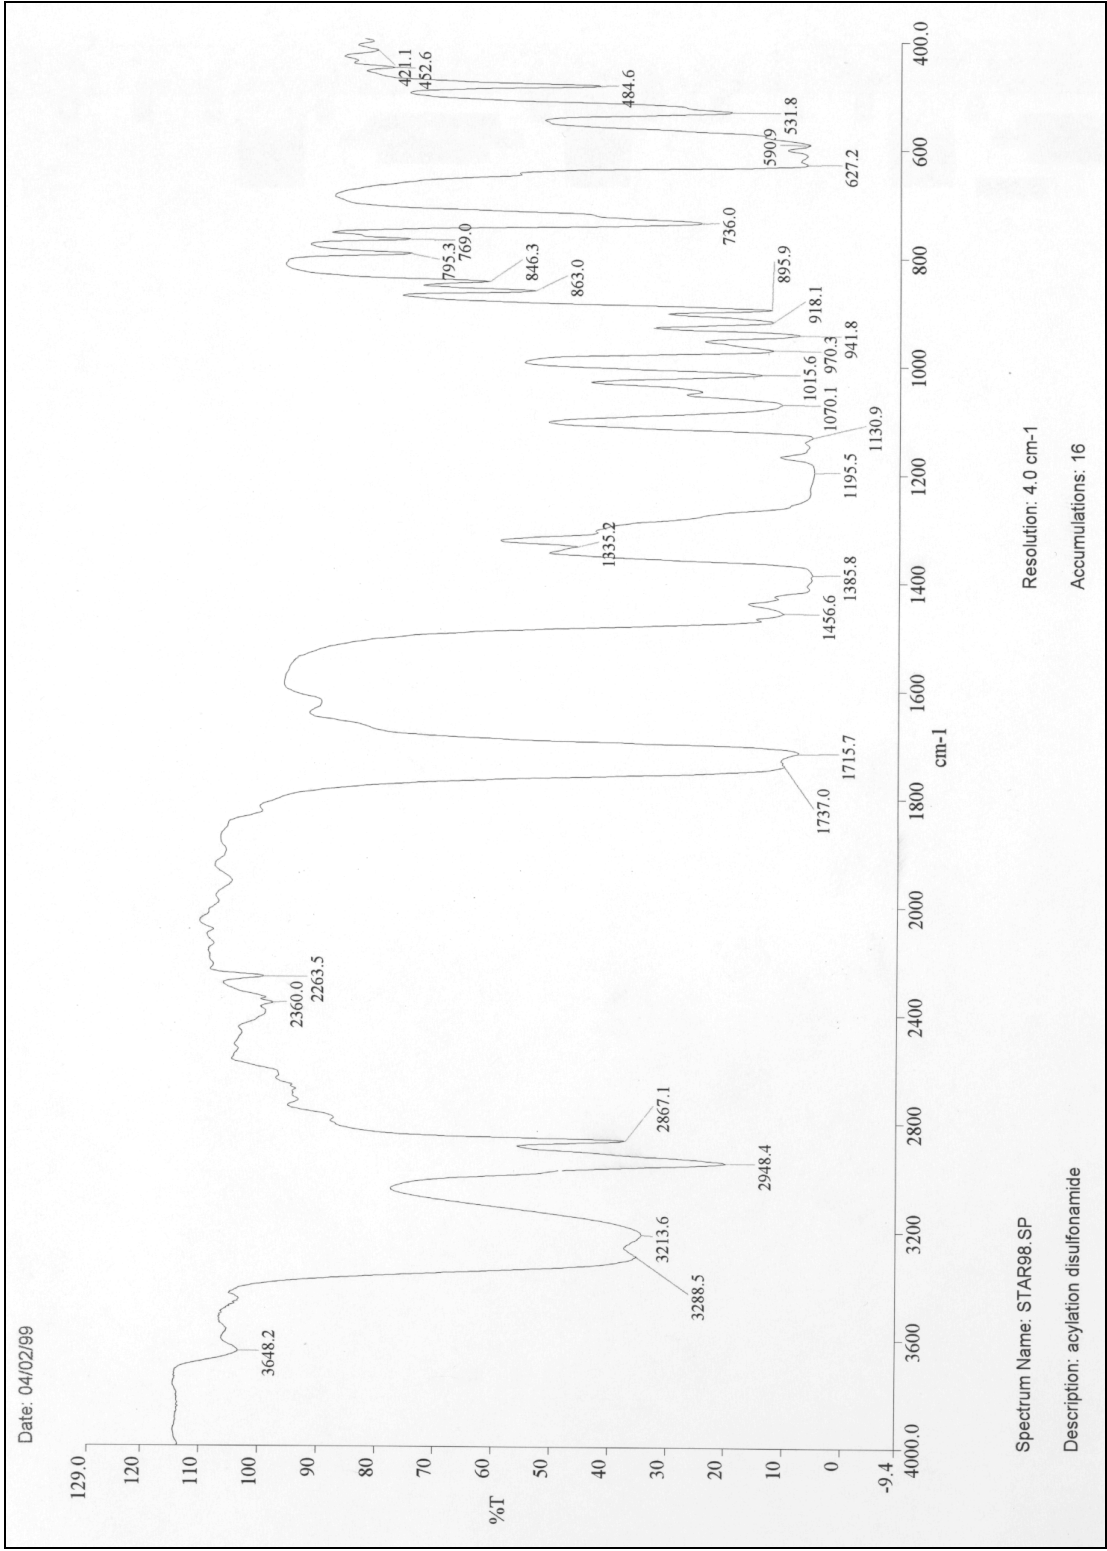

**(1*S*,2*S*)-*N*-Acetyl-*N'*-methyl-1,2-*bis*-trifluoromethanesulfonamidocyclohexane (2).** A solution of diazomethane (25 mmol) in Et<sub>2</sub>O (20 mL) prepared from 1-methyl-3-nitro-1-nitrosoguanidine was added cautiously dropwise to a stirred solution of (1*S*,2*S*)-*N*-acetyl-1,2-*bis*-(trifluoromethanesulfonamido)-cyclohexane **(1*S*,2*S*)-1** (1.00 g, 2.38 mmol) in Et<sub>2</sub>O (20 mL) at 0 °C. The resulting mixture was maintained under an inert atmosphere (N<sub>2</sub>) and stirred at room temperature overnight. TLC analysis (EtOAc/*n*-Hexane: 2/8) showed complete conversion of the precursor. Evaporation of the solvent under reduced pressure, followed by flash chromatography on silica gel (EtOAc/*n*-Hexane: 5/95), afforded the desired *N*-methyl derivative as a colourless oil in quantitative yield. mp 38-40 °C;  $[\alpha]_D^{20} = +6.22^\circ$  (c = 4.1; CHCl<sub>3</sub>); <sup>1</sup>H NMR (200 MHz, CDCl<sub>3</sub>)  $\delta$  1.00 to 1.65 (m, 3H), 1.68 to 2.05 (m, 4H), 2.48 (s, 3H), 2.40 to 2.75 (m, 1H), 2.96 (s, 3H), 4.02 (td, *J*=11.37 Hz and *J*=4.28 Hz, 1H), 5.58 (td, 1H, *J*=10.95 Hz et *J*=4.52 Hz, 1H); <sup>13</sup>C RMN (50 MHz, CDCl<sub>3</sub>)  $\delta$  = 24.2, 25.5, 27.3, 28.7, 30.0, 30.5, 57.1, 62.8, 119.5, 120.2, 169.9 ppm. FTIR (CsI)  $\nu$  = 3455, 2950, 2869, 1740, 1398, 1190, 1131, 1098, 1065, 981, 951, 933, 895, 774, 609, 533, 491; MS (IC/NH<sub>3</sub>, *m/z*) = 452 [M+NH<sub>4</sub>]<sup>+</sup>.

\*\*\* Current Data Parameters \*\*\*  
 NAME : star627  
 EXPNO : 3  
 PROCNO : 1  
 \*\*\* Acquisition Parameters \*\*\*  
 BF1 : 200.130000 MHz  
 D[1] : 1.000000 sec  
 DE : 10.0 usec  
 DS : 2  
 NS : 16  
 PI[1] : 8.0 usec  
 PROBD : 5 mm Dual 13C/1H  
 PULPROG : zg30  
 RG : 128.000000  
 RO : 20 Hz  
 SOLVENT : CDCl3  
 SW : 20.0189 ppm  
 TD : 16384  
 TE : 300.0 K  
 \*\*\* Processing Parameters \*\*\*  
 LB : 0.00 Hz  
 SI : 32768  
 SSB : 0.000000  
 \*\*\* ID NMR Phat Parameters \*\*\*  
 SR : 5.18 Hz  
 AQ\_time : 2.0447230 sec

1.988  
1.965  
1.942  
1.919  
1.896  
1.873  
1.850  
1.827  
1.804  
1.781  
1.758  
1.735  
1.712  
1.689  
1.666  
1.643  
1.620  
1.597  
1.574  
1.551  
1.528  
1.505  
1.482  
1.459  
1.436  
1.413  
1.390  
1.367  
1.344  
1.321  
1.298  
1.275  
1.252  
1.229  
1.206  
1.183  
1.160  
1.137  
1.114  
1.091  
1.068  
1.045  
1.022  
1.000  
0.977  
0.954  
0.931  
0.908  
0.885  
0.862  
0.839  
0.816  
0.793  
0.770  
0.747  
0.724  
0.701  
0.678  
0.655  
0.632  
0.609  
0.586  
0.563  
0.540  
0.517  
0.494  
0.471  
0.448  
0.425  
0.402  
0.379  
0.356  
0.333  
0.310  
0.287  
0.264  
0.241  
0.218  
0.195  
0.172  
0.149  
0.126  
0.103  
0.080  
0.057  
0.034  
0.011  
0.000

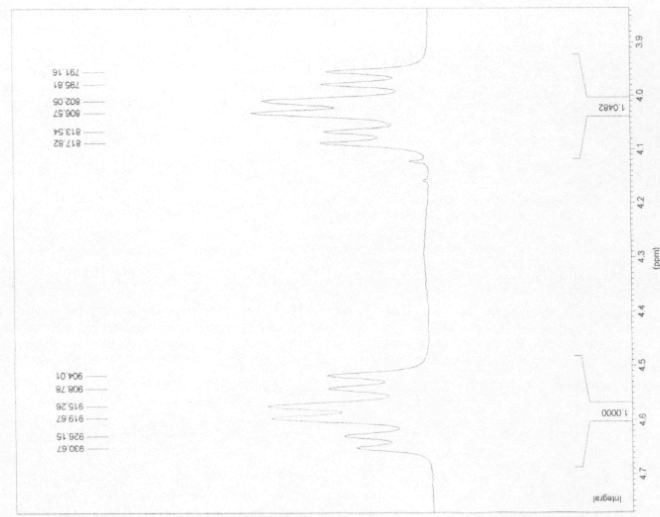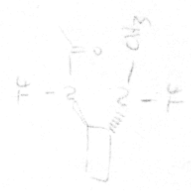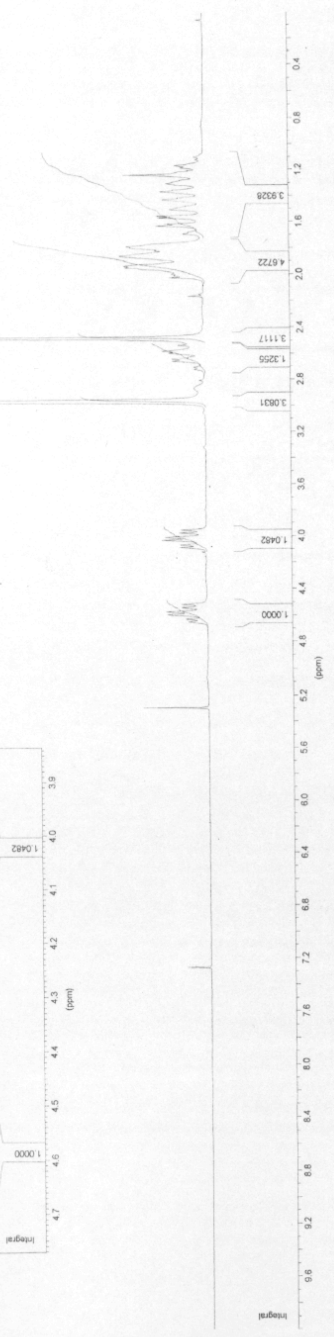

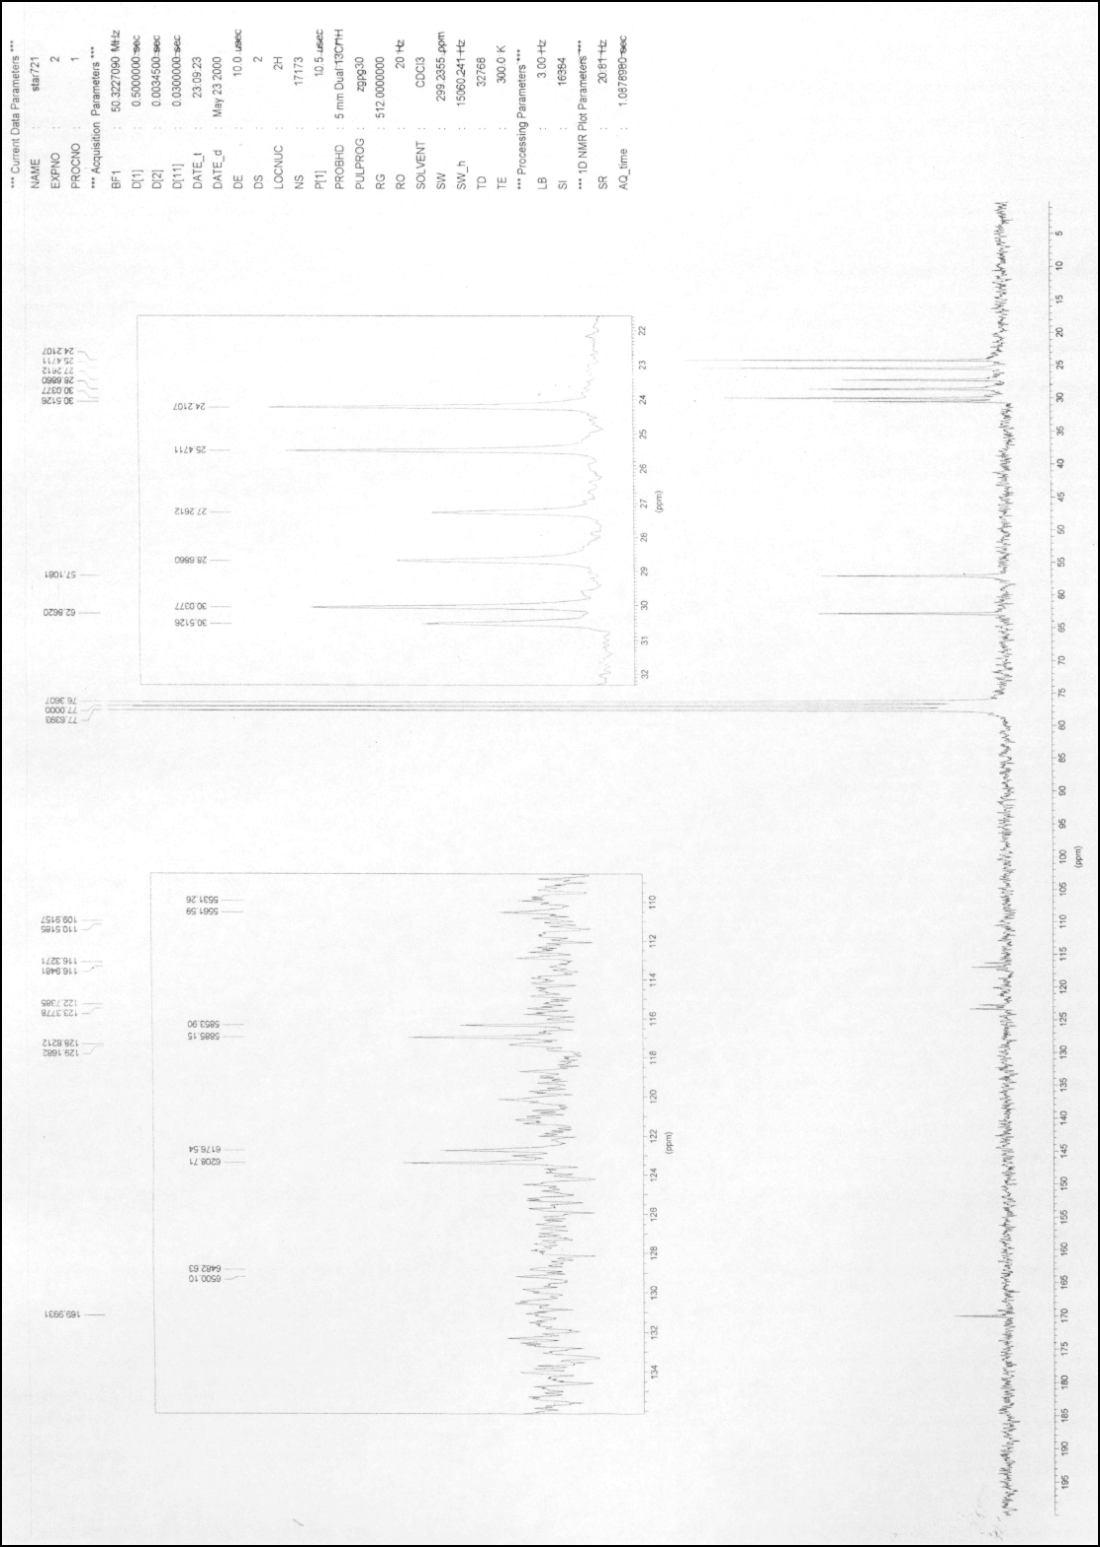



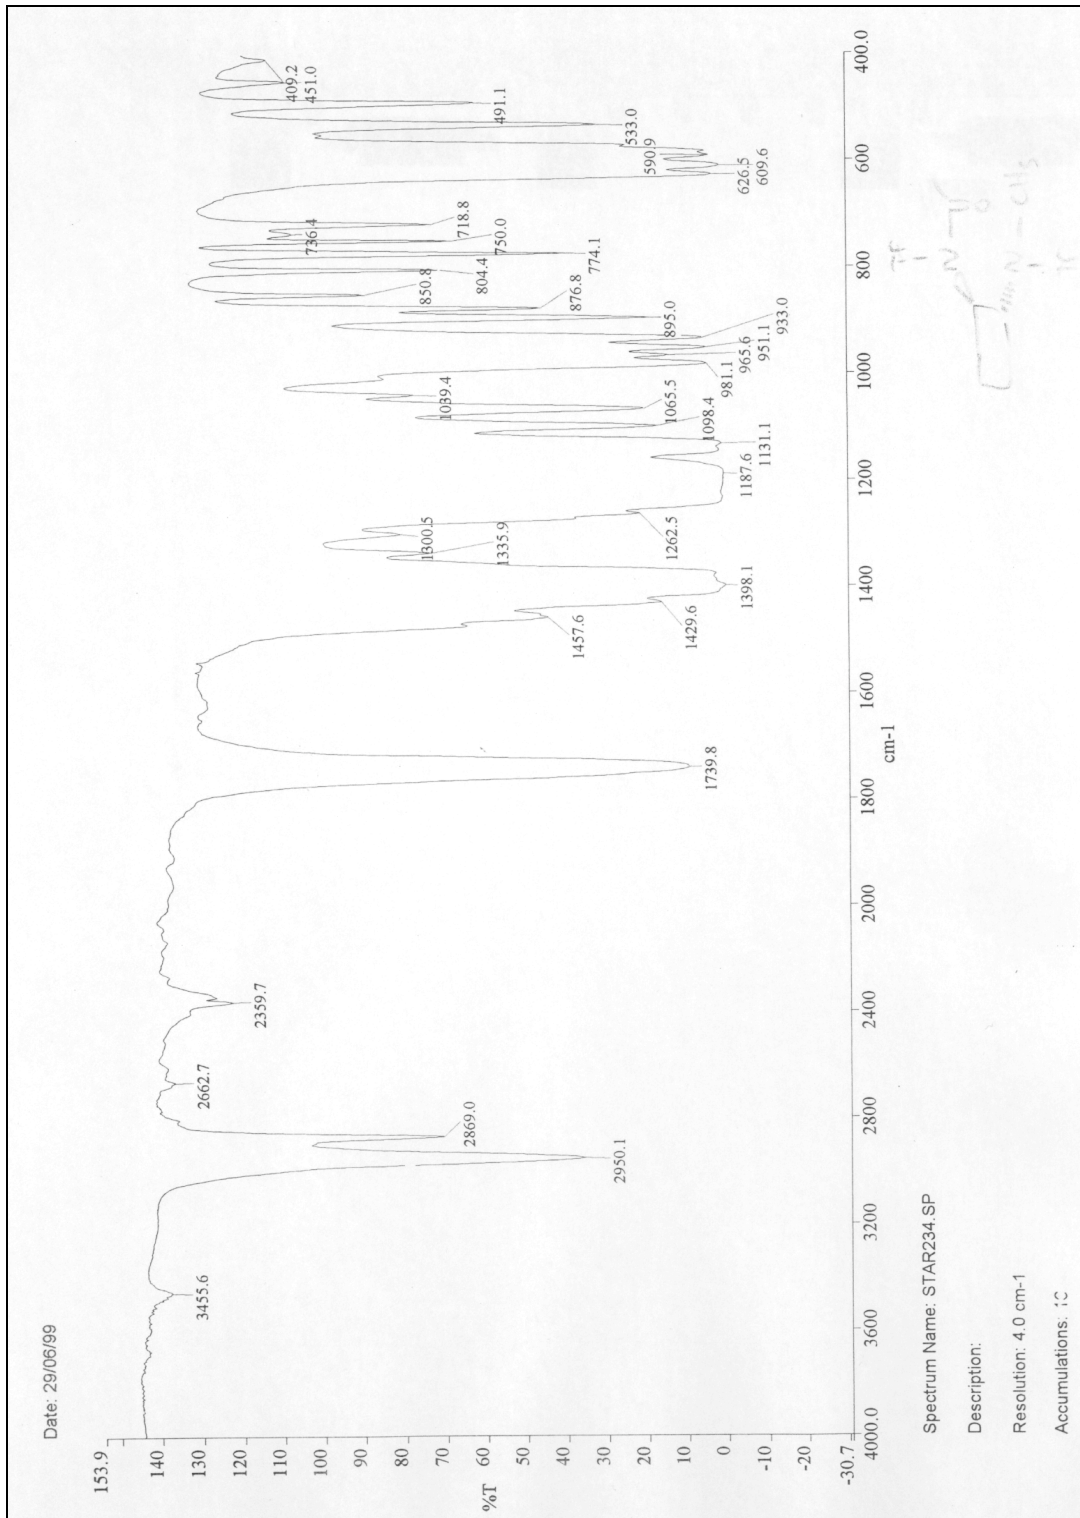



**(1*S*,2*S*)-*N*-Acetyl-*N*'-benzyl-1,2-bis-trifluoromethanesulfonamidocyclohexane (3).** A solution of **(1*S*,2*S*)-1** (650 mg, 1.55 mmol) in dry dichloromethane (10 mL) is added to a solution of benzyldiazonium (4.64 mmol) prepared according to the procedure developed by Reese,<sup>1</sup> in 5 mL of dichloromethane at room temperature. When the nitrogen evolution ceased, evaporation of the solvent under reduced pressure, followed by flash chromatography on silica gel (EtOAc/*n*-Hexane: 1/9), afforded the desired *N*-benzyl derivative as a colourless oil in 86 % yield.  $[\alpha]_D^{20} = +10.43$  (c = 0.23; CHCl<sub>3</sub>); <sup>1</sup>H NMR (300 MHz, CDCl<sub>3</sub>)  $\delta$  1.00 to 2.30 (6m, 7H), 2.55 (s, 3H), 2.40 to 2.79 (m, 1H), 4.05 to 4.28 (m, 1H), 4.38 and 4.75 (2d, 2H, *J*=15 Hz), 4.55 to 4.75 (m, 1H), 7.18 to 7.60 (m, 5H); <sup>13</sup>C RMN (75 MHz, CDCl<sub>3</sub>)  $\delta$  23.6, 25.4, 27.5, 28.9, 33.7, 48.8, 58.9, 64.4, 119.6, 119.5, 128.6, 129.6, 135.1, 170.1. FTIR (CsI)  $\nu$  2945, 1738, 1398, 1204, 1128, 1027, 951, 898, 734, 607. MS (IC/NH<sub>3</sub>, m/z) = 528 [M+NH<sub>4</sub>]<sup>+</sup>.

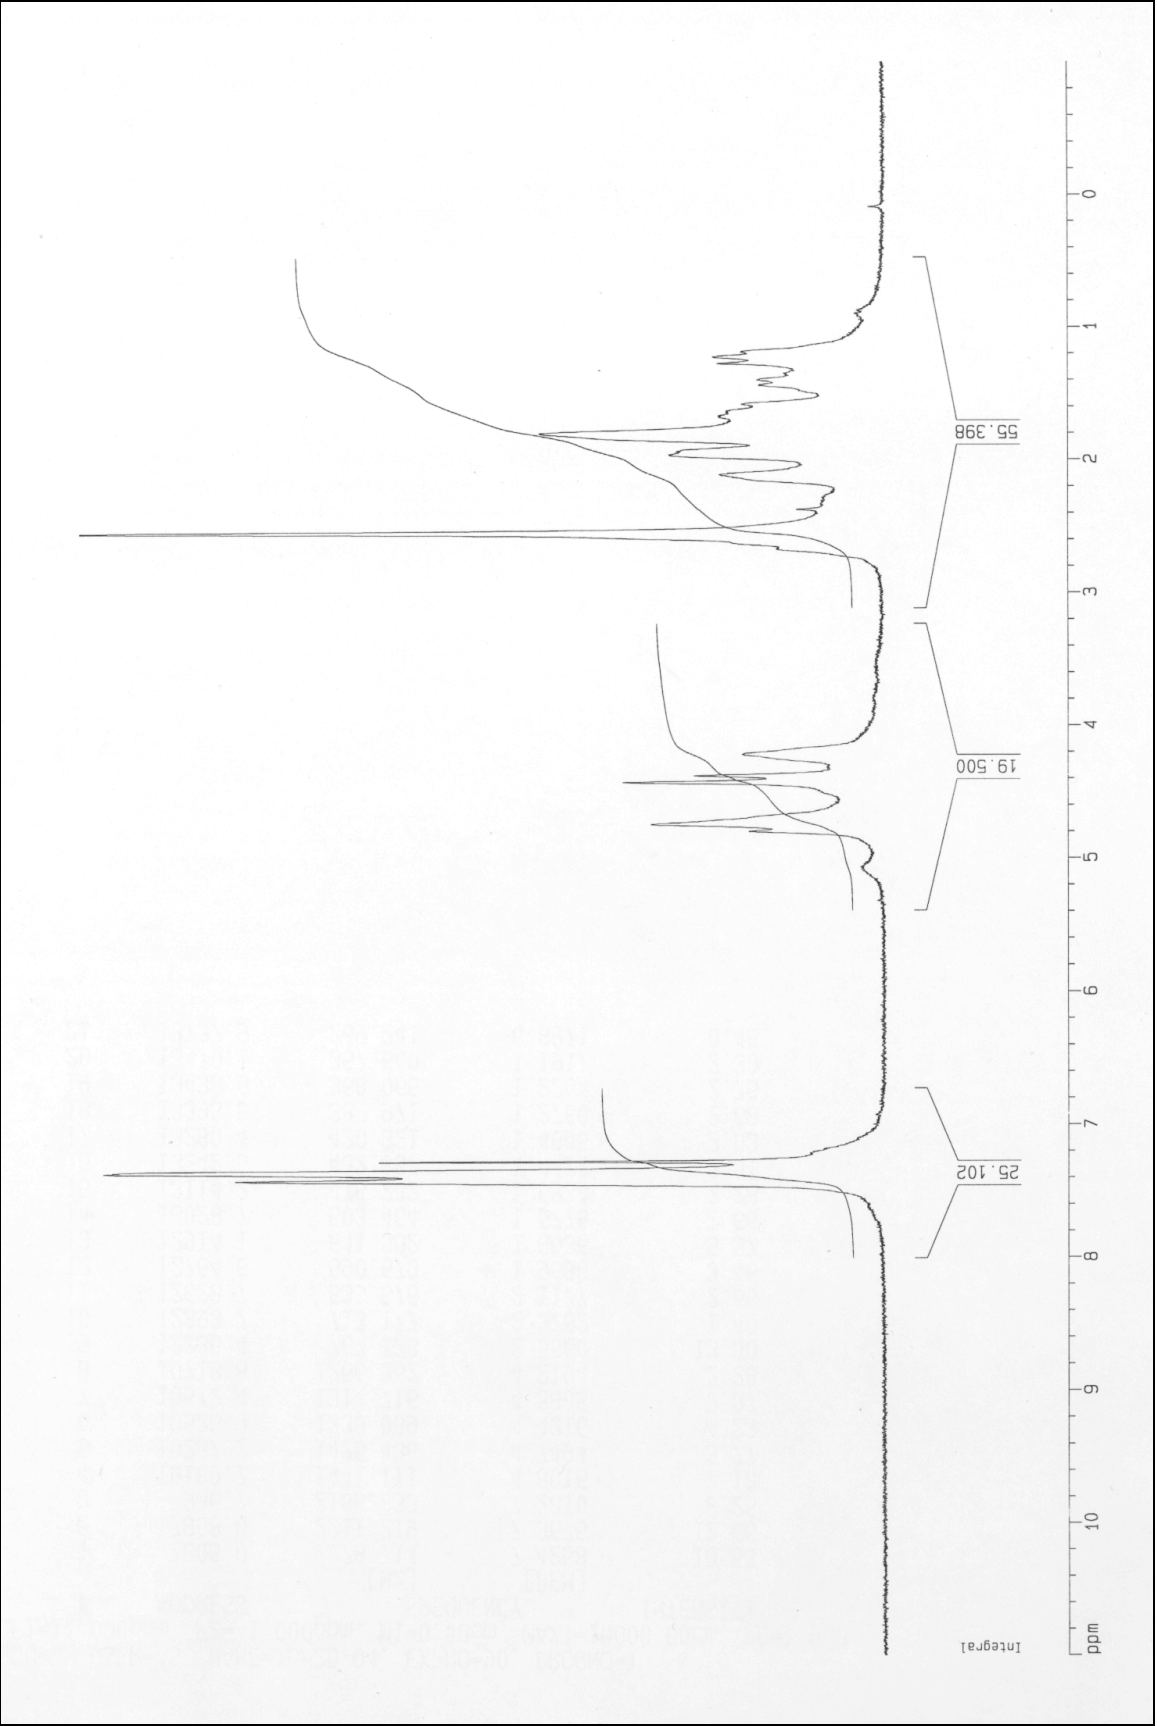

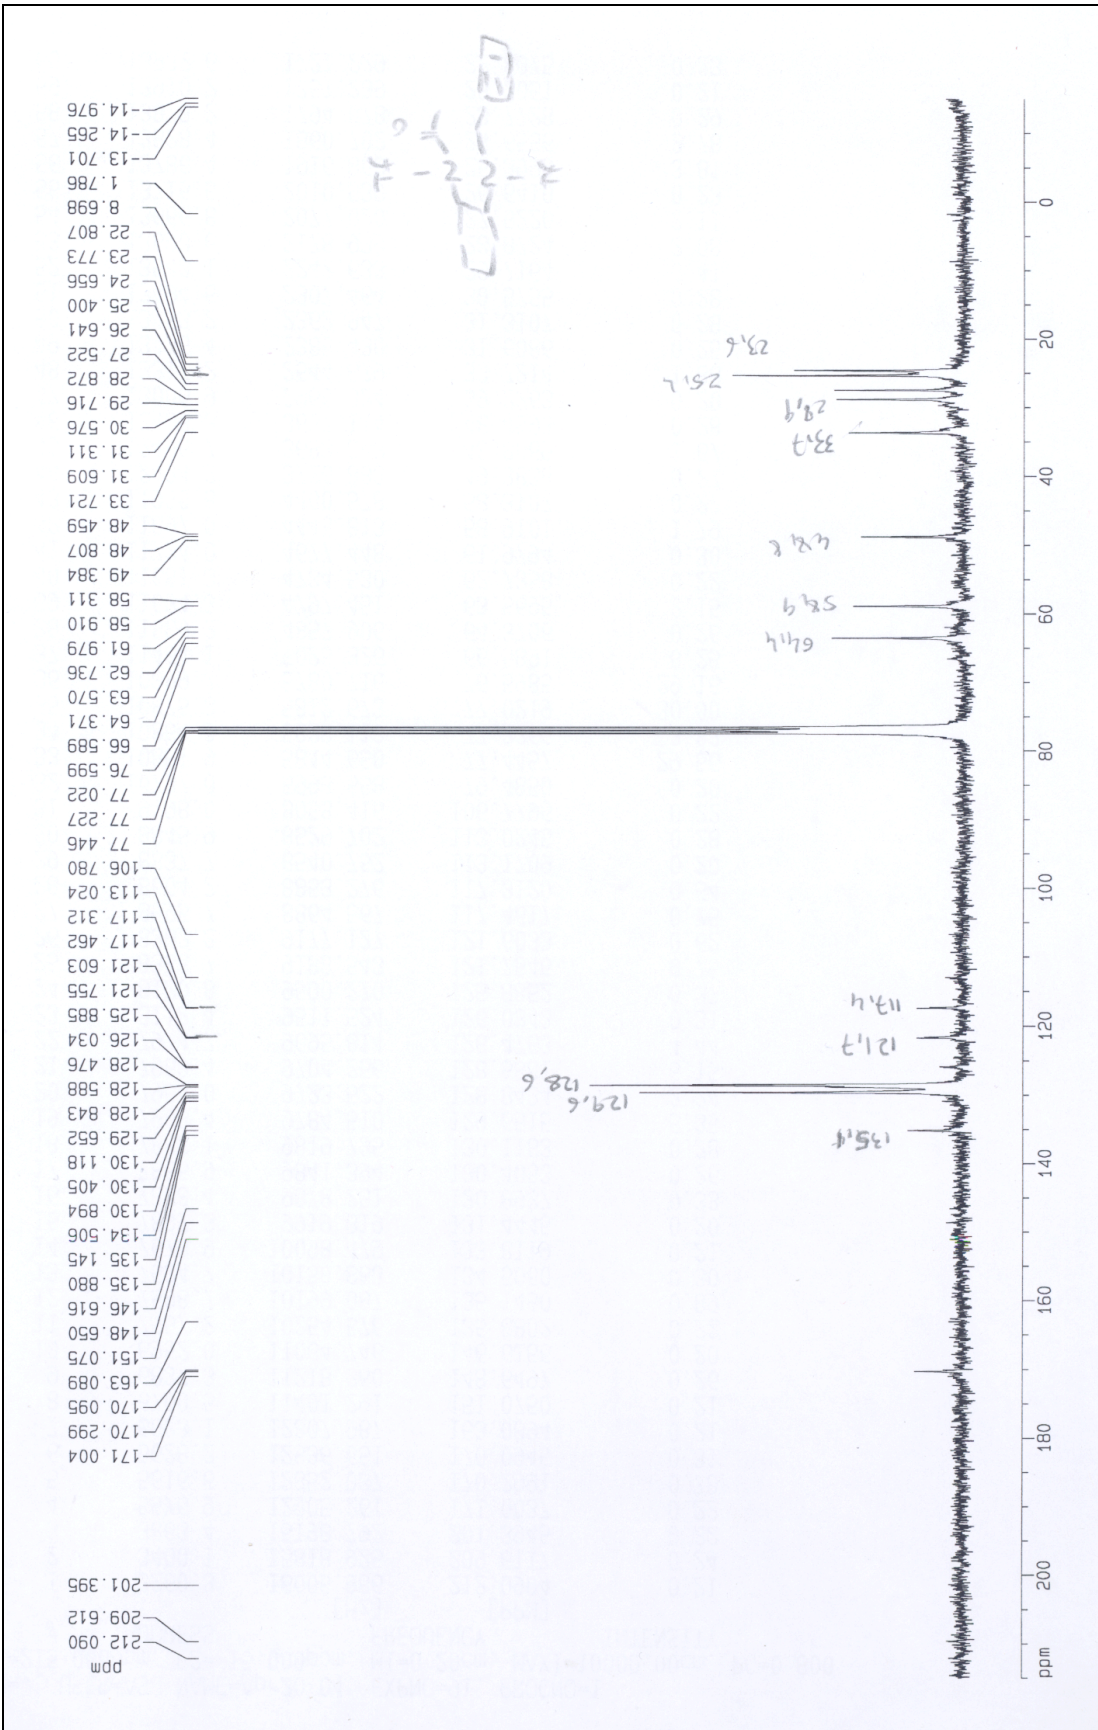



**(1*S*,2*S*)-*N*-Acetyl-*N'*-polymer-supported-1,2-bis-trifluoromethanesulfonamidocyclohexane**

**(4).** Polymer-supported reagent **4** was prepared in four steps starting Merrifield resin; each step being monitored using IR spectroscopy (recorded using a Perkin-Elmer 2000 FT-IR directly on the resin beads). The solid-phase synthesis was initiated by treating commercially available Merrifield resin (chloromethylated polystyrene, 1% cross-linked divinylbenzene, 1.58 mmol.g<sup>-1</sup>) with 4-hydroxy-benzaldehyde and sodium hydroxyde in DMSO (90°C),<sup>2</sup> to afford the benzaldehyde resin **5** ( $\nu_{\text{C=O}}=1695\text{ cm}^{-1}$ ) in excellent yield (>95% determined by elementary analysis; loading=1.39 mmol.g<sup>-1</sup>). Resin **5** was then treated with 1,3,5-triisopropylbenzene-sulfonyl hydrazine at room temperature leading to the supported hydrazone **6** which was subsequently treated with potassium hydroxyde in a MeOH/THF mixture (90°C).<sup>3</sup> The resulting supported benzyl diazonium salt **7** reacted at room temperature with (1*S*,2*S*)-*N*-acetyl-1,2-bis-trifluoromethanesulfonamidocyclohexane **(1*S*,2*S*)-1** in DMF leading to the desired supported chiral reagent **4** ( $\nu_{\text{C=O}}=1743\text{ cm}^{-1}$ ). The loading of resin **4** was determined as 0.58 mmol.g<sup>-1</sup> by treating it with an excess of (±)-1-phenylethylamine and quantifying the recovered acetylated product. This value was also confirmed by fluorine elemental analysis. Polymer-supported reagent **4** was prepared in a 65% overall yield from readily available Merrifield resin.



Date: 19/01/01

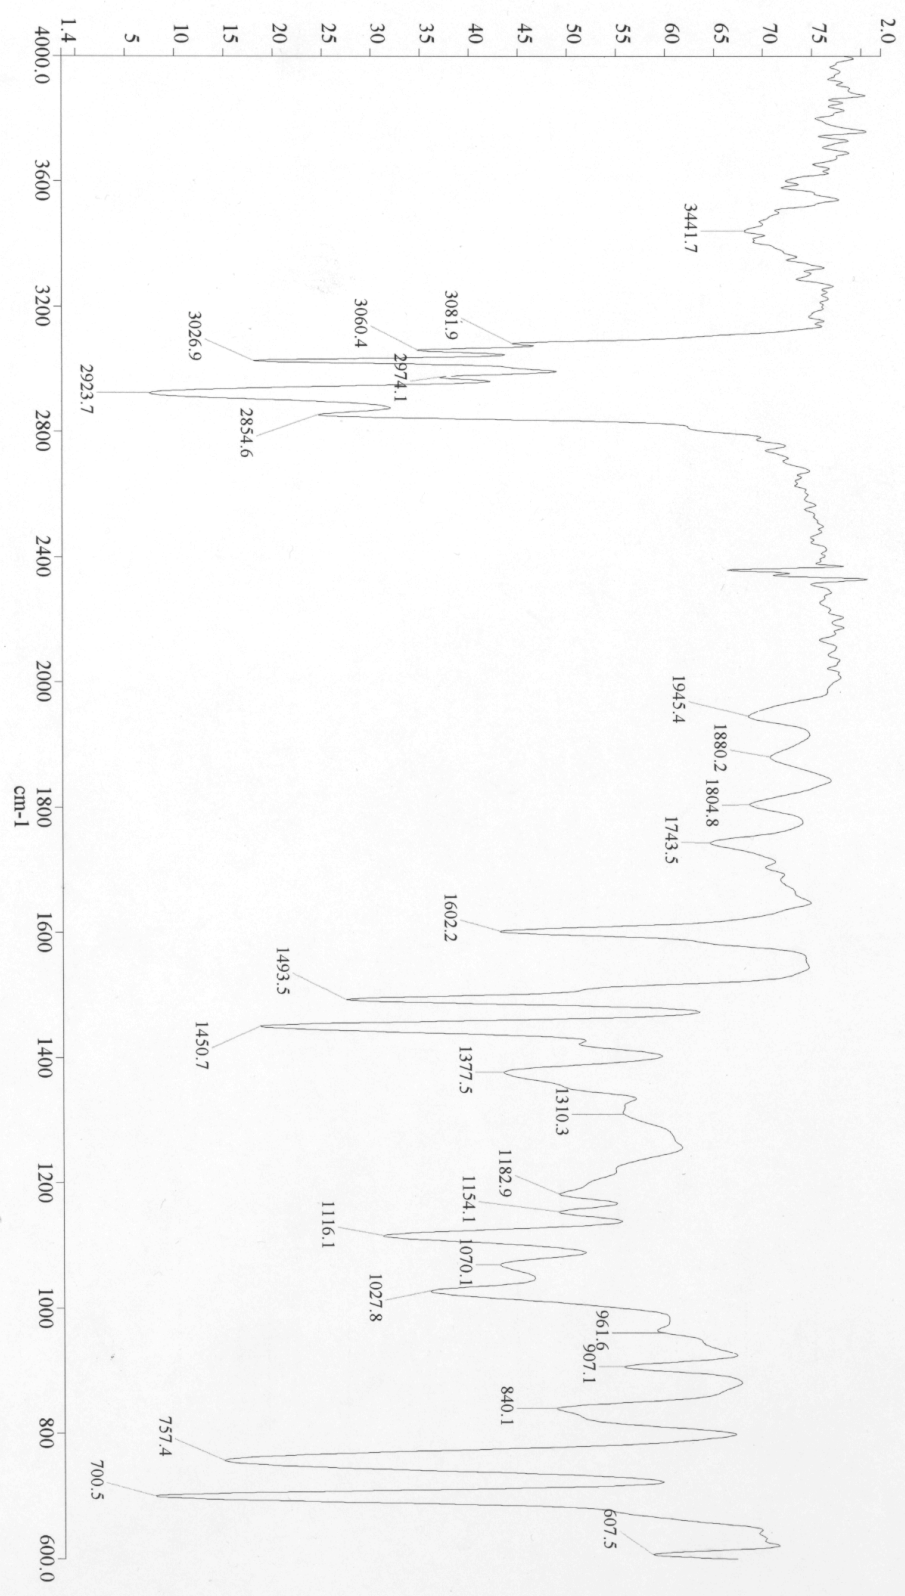

Spectrum Name: star606.sp  
Description: Spectrum At -24128,758,-1678 Micrometers  
Aperture: 64.66  
Resolution: 4.0 cm-1  
Accumulations: 16

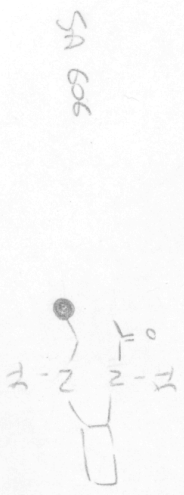



**General procedure for enantioselective acetylation of secondary alkylamines.** Racemic amine (0.5 mmol) was added by syringe to an agitated solution of supported chiral acetylating agent (0.10 mmol) in the chosen solvent system at room temperature, and the mixture was agitated for 3 hr. The resin was then filtered, washed with dichloromethane, and the solvents were removed under reduced pressure. The resulting residue was then purified by flash chromatography on silica gel (EtOAc/*n*-Hexane: 1/1) and analyzed by HPLC using a chiral stationary phase.

| Product                                                                             | ee assay     | Conditions                                     | Retention Time of first isomer (min) | Retention Time of second isomer (min) |
|-------------------------------------------------------------------------------------|--------------|------------------------------------------------|--------------------------------------|---------------------------------------|
| 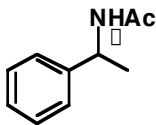  | Chiralcel OD | 35°C<br>0.8 ml / min<br>Pentane / EtOH<br>98/2 | 38.57 ( <i>R</i> )                   | 42.75 ( <i>S</i> )                    |
|  | Chiralcel OD | 35°C<br>1 ml / min<br>Hexane / EtOH<br>97/3    | 13.98                                | 16.85                                 |
|  | Chiralcel OD | 30°C<br>1.2 mL / min<br>Hexane / EtOH<br>85/15 | 4.00                                 | 5.75                                  |
|  | Chiralcel OD | 35°C<br>0.8 mL / min<br>Hexane / EtOH<br>97/3  | 20.18                                | 23.57                                 |

<sup>1</sup> Reese, C. B.; Dudman, C. C. *Synthesis* **1982**, 5, 419.

<sup>2</sup> Beebe, X.; Chiappari, C. L.; Olmstead, M. M.; Kurth, M. J.; Schore, N. E. *J. Org. Chem.*, **1995**, 60, 4204.

<sup>3</sup> Bhalay, G.; Dunstan, A. R. *Tetrahedron Lett.*, **1998**, 39, 7803.
